# Supplementary material
Source: HighWire-hosted journal article supplement (https://www.annfammed.org/highwire/filestream/8267/field_highwire_adjunct_files/0/Meropol_Supp_App_Tables_A1-A5.pdf)
Supplement: Meropol_Supp_App_Tables_A1-A5.pdf [file Meropol_Supp_App_Tables_A1-A5.pdf]

## Online Supplementary Material

Meropol SB, Localio AR, Metlay JP. Risks and benefits associated with antibiotic use for acute respiratory infections: a cohort study. *Ann Fam Med*. 2013;11(2):165-172.

<http://www.annfammed.org/content/11/2/165>

---

### Supplemental Appendix. Additional Analyses

#### Methods

Our visit grouping for the principal analysis classified encounters as antibiotic-exposed if any visits within the 2-week window included an antibiotic prescription. To address the possibility that this may have misclassified in favor of antibiotic use, we performed additional analyses using ungrouped visits, analyzing visits independently.

Because we anticipated that the propensity for prescribing antibiotics, and thus antibiotic exposure could vary widely between practices, we calculated separate propensity scores for each practice using the same covariates in each practice's model. The propensity score quintile was used in the principal regression model, replacing the included covariates. We also considered results stratified by propensity score quintile, looking for a potential dose effect; this compares risk for adverse events among patients with similar propensities to be prescribed antibiotics. Additionally, we modeled the odds of a severe adverse event using a more conventional multiplicative model, with conditional fixed-effects *logistic* regression.

The risk of certain adverse events may vary with exposure to specific antibiotic class, for example,  $\beta$ -lactams may increase the risk of seizures,<sup>1</sup> and macrolides and fluoroquinolones may increase the risk of cardiac arrhythmias.<sup>2</sup> Accordingly, we also modeled specific antibiotic drug class exposure, focusing on  $\beta$ -lactams, macrolides, and fluoroquinolones, as class-specific antibiotic vs no antibiotic exposure, and as class-specific antibiotic vs other antibiotic exposure. We did not have adequate power to model each individual adverse event category as a separate outcome.

If antibiotic exposure was a marker for certain unmeasured patient characteristics which make it more likely a patient would be admitted to the hospital, this could bias our results, making us more likely to find hospital admissions in antibiotic-exposed individuals because of residual confounding by these factors. To address this possibility, we included a control outcome, hospital admissions due to motor vehicle accidents. These admissions should have no plausible causal relationship with previous antibiotic exposure; if an association was found it would be evidence of residual confounding.<sup>1</sup>

We performed a crossover-cohort study for patients with severe adverse events and multiple visits within the cohort. Case time was defined as the 14 days following each acute nonspecific respiratory infection index visit associated with a severe adverse event. Control time was defined as the 14 days following all of that patient's previous<sup>3</sup> non-index visits.  $\chi^2$  Testing was used to calculate the odds ratio comparing adverse events for antibiotic-exposed vs unexposed visits for each patient. We were unable to include visits after the severe adverse event episode, because we wanted to avoid potential selection bias due to "depletion of susceptibles"; physicians may have been less likely to prescribe an antibiotic to a patient who had previously experienced an antibiotic-associated severe adverse event. Thus, although this method helps adjust for unmeasured inter-individual confounders and intra-individual time-invariant confounders, it does not adjust for unmeasured intra-individual confounders that vary with time.

We performed simulations to explore whether our results were robust to our assumptions, using a linear fixed-effects model for our very rare dichotomous outcome. One potential limitation of using a more conventional conditional logistic regression to model a rare outcome is that data from practices with zero outcomes in the comparator (no antibiotic) group would provide a zero in the odds ratio denominators for those practices, and information from those practices would not be included in the analysis. The data from the practices with zero events are likely to be different in many respects from data from practices with non-zero events; to the extent that these events are not distributed randomly across practices, losing this information in the analysis risks obtaining biased results. We compared the performance of our conditional fixed-effects linear model (using Stata's `xtreg` command) under varying conditions and assumptions, and compared these results with those using a fixed-effects logistic model, conditional on practice, using Stata's `xtlogit` command. We generated simulated datasets to reflect conditions similar to our data: large (2 million visits), highly hierarchical (200 practices with 10,000 patient visits each), a relatively common and variable exposure across practices, and a rare outcome, variable across practices (specified to be 0.0000866, with a mean risk difference of  $-0.0000411$  for the protective effect for exposed vs unexposed visits); many practices thus included zero outcomes.

## Results

Our cohort contained 1,646,229 total and 1,531,019 grouped visits. Using ungrouped visits, our results were virtually identical to those of the primary analysis, a risk difference of 1.07 fewer severe adverse events per 100,000 patient visits (95% CI,  $-4.52$  to  $2.38$ ;  $P = .54$ ) comparing antibiotic-exposed vs unexposed patients. In the propensity-adjusted model, results were similar to those of the principal analysis; the risk difference for severe adverse events was 1.60 fewer events per 100,000 patient visits (95% CI,  $-5.29$  to  $2.09$ ;  $P = .39$ ), comparing antibiotic-exposed with unexposed patients. Stratifying the analysis by propensity score category, comparing patients with similar propensities to be prescribed antibiotics, and thus relatively similar underlying conditions, there remained no association of adverse events with antibiotic exposure, and there did not appear to be a clear trend over propensity score categories, (Table A4) further evidence against residual confounding by indication.

Using fixed-effects logistic regression, conditional on practice (Stata's `xtlogit`), adjusted for the number of different drug classes prescribed during the past year and Townsend score, the odds ratio for a severe adverse event for patients exposed compared with unexposed to an antibiotic was 0.81 (95% CI, 0.53 to 1.22;  $P = .31$ ); data from 770,601 visits (50% of the visits) from the 237 practices with zero adverse events were dropped from this analysis.

We obtained the expected null result of no association between antibiotic exposure and hospital admission for motor vehicle accident, with an adjusted risk difference for antibiotic-exposed vs unexposed visits of 0.78 fewer per 100,000 visits (95% CI,  $-1.70$  to  $0.13$ ;  $P = .09$ ).

The crossover-cohort study compared 61 case visits matched with 173 previous control visits by the case patients, and yielded an odds ratio for antibiotic-exposed vs unexposed visits of 0.87 per 100,000 visits (95% CI, 0.44 to 1.76;  $P = .66$ ), results qualitatively similar to our primary analysis.

When assessing class-specific antibiotic exposure vs other antibiotic exposure, while point estimates varied, none were statistically significant (Table A5).

The mean regression slope from the simulated data was  $-0.0000372$ , using the conditional fixed-effects additive model (`xtreg`), compared with the true value of  $-0.0000411$  used to generate the data, or a 9.5% bias toward the null value of the slope = 0. The power to find this difference in slope using this model was estimated at 0.81. This result was robust to varying the number of practices. Despite the design effect, which should give us increased power with more practices, keeping the number of visits constant, the power diminishes with the progressively increasing numbers of zero-event practices seen, as the number of visits per practice decreases with increasing practice size. With increasing numbers of zero-event practices, it gets progressively more difficult to show significant differences between antibiotic-exposed and -unexposed visits within each practice. Given the stipulated simulated data, our stipulated risk difference for severe adverse event of  $-0.0000411$  in antibiotic exposed vs unexposed visits should correspond to an odds ratio of 0.5357. Using the same

simulated data, with a conditional fixed-effects logistic model (xtlogit), we found an odds ratio of 0.574, biased 7.1% toward the null, similar to our conditional linear regression xtreg results, with a power of 0.80.

Thus, using simulations, we confirmed that conditional fixed-effects linear regression provided reliable estimates of common exposure treatment effects on rare outcome risks, compared with fixed-effects conditional logistic regression. Results using these models were quite similar to results obtained using more traditional methods for binary outcomes, but were able to utilize all available information, even from groups with zero events.

### References

1. Meropol SB, Chen Z, Metlay JP. Reduced antibiotic prescribing for acute respiratory infections in adults and children. *Br J Gen Pract.* 2009;59(567):e321-e328.
2. Rosenfeld RM, Andes D, Bhattacharyya N, et al. Clinical practice guideline: adult sinusitis. *Otolaryngol Head Neck Surg.* 2007;137(3)(Suppl):S1-S31.
3. Bucher HC, Tschudi P, Young J, et al.; BASINUS (Basel Sinusitis Study) Investigators. Effect of amoxicillin-clavulanate in clinically diagnosed acute rhinosinusitis: a placebo-controlled, double-blind, randomized trial in general practice. *Arch Intern Med.* 2003;163(15):1793-1798.

| <b>Table A1. Acute Respiratory Infection Diagnostic Codes</b>                                    |                  |
|--------------------------------------------------------------------------------------------------|------------------|
| <b>THIN Read Code Description</b>                                                                | <b>Read Code</b> |
| Other acute upper respiratory infections                                                         | H05..00          |
| Acute upper respiratory tract infection                                                          | H051.00          |
| Upper respiratory infection NOS                                                                  | H05z.00          |
| Upper respiratory tract infection NOS                                                            | H05z.11          |
| Acute nasopharyngitis                                                                            | H00..00          |
| Acute pharyngitis                                                                                | H02..00          |
| Throat infection – pharyngitis                                                                   | H02..13          |
| Acute pharyngitis NOS                                                                            | H02z.00          |
| Sore throat NOS                                                                                  | H02..11          |
| Acute bronchitis                                                                                 | H060.00          |
| Bronchitis unspecified                                                                           | H30..00          |
| NOS = not otherwise specified; THIN = The Health Improvement Network (CSD Medical Research, UK). |                  |

| <b>Table A2. Adverse Event Diagnostic Codes</b> |                                        |                  |
|-------------------------------------------------|----------------------------------------|------------------|
| <b>Category</b>                                 | <b>THIN Read Code Description</b>      | <b>Read Code</b> |
| Cardiac arrhythmia                              | Cardiac arrest                         | G575.00          |
|                                                 | Rhythm ventricular conduction aberrant | G56y.00          |
|                                                 | Tachycardia paroxysmal                 | G572z00          |
|                                                 | Arrhythmia ectopic                     | G576.00          |
|                                                 | Ventricular fibrillation               | G574000          |
|                                                 | Heartbeats ectopic                     | G576000          |
|                                                 | Ventricular ectopic beats              | G576200          |
|                                                 | Heartbeat extrasystoles                | G576011          |
|                                                 | Cardiac arrhythmia                     | G57z.00          |
|                                                 | Fibrillation/flutter                   | G57..00          |
|                                                 | Ventricular flutter                    | G574100          |
|                                                 | Ventricular tachycardia paroxysmal     | G571.00          |
|                                                 | Premature heartbeats                   | G576.11          |
|                                                 | Premature contractions heart           | G576000          |
|                                                 | Premature beats junctional             | G576400          |
|                                                 | Supraventricular ectopic beats         | G576100          |
| Diarrhea                                        | Diarrhoea                              | 19F..11          |
|                                                 | Diarrhoea cause not determined         | 19F2.00          |
|                                                 | Bloody diarrhoea                       | 19E6.00          |
| Liver toxicity                                  | Hepatic function abnormal              | 44D2.00          |
|                                                 | Liver enzymes abnormal                 | 44G2.00          |
|                                                 | Liver function test abnormal           | L3260AB          |
|                                                 | Necrosis massive hepatic acute         | J600.00          |
|                                                 | Acute hepatitis                        | J600100          |
|                                                 | Subacute massive hepatic necrosis      | J601.00          |
|                                                 | Hepatic coma                           | J622.00          |
|                                                 | Hepatic failure                        | J62y.13          |
|                                                 | Liver disease                          | J63..00          |
|                                                 | Hepatitis                              | J633.00          |
|                                                 | Toxic hepatitis due drug sensitivity   | J633000          |
|                                                 | Jaundice cholestatic                   | J66y600          |
|                                                 | Jaundice drug induced                  | R024.00          |
| Serum jaundice                                  | A703.00                                |                  |
| Hypersensitivity                                | Dermatitis allergic                    | M128.00          |
|                                                 | Skin allergic reaction                 | M12zz00          |
|                                                 | Dermatitis nummular                    | M1y0.00          |
|                                                 | Erythema multiforme exudativum         | M151.00          |

Continued

**Table A2. Adverse Event Diagnostic Codes, *continued***

| Category       | THIN Read Code Description                          | Read Code |
|----------------|-----------------------------------------------------|-----------|
|                | Syndrome Stevens-Johnson                            | M151700   |
|                | Toxic epidermal necrolysis                          | M151800   |
|                | Acne cachecticorum (Hebra)                          | M261X00   |
|                | Oedema angioneurotic                                | SN51.00   |
|                | Urticaria giant                                     | M28..00   |
|                | Syndrome scalded skin                               | M15y000   |
|                | Allergy penicillin                                  | TJ00.00   |
|                | Chloromycetin allergy                               | TJ02000   |
|                | Allergy cephalosporin                               | TJ05.00   |
|                | Suphonamides allergy                                | TJ10.00   |
|                | Septin allergy                                      | TJ0yD00   |
|                | Drug allergy                                        | SN52.12   |
|                | Reaction anaphylactic drug                          | SN50100   |
|                | Erythema due medicine ingested                      | M130.11   |
|                | Adverse reaction drug ingested                      | TJ...00   |
|                | Allergy drug by mouth                               | SN52.00   |
|                | Shock reaction anaphylactic                         | SN50.00   |
|                | Medical care adverse effects                        | SP...00   |
|                | Antibodies anaphylactic present                     | R15z000   |
|                | Lyell's disease                                     | M151.11   |
|                | Epidermal necrolysis                                | M151.12   |
| Phototoxicity  | Photodermatosis                                     | M127300   |
|                | Dermatitis sunlight                                 | M127000   |
|                | Photosensitivity                                    | M127400   |
| Renal toxicity | Nephritis acute                                     | K00..11   |
|                | Membranous glomerulonephritis                       | K011.00   |
|                | Nephrosis                                           | K01..00   |
|                | Nephritis                                           | K0...00   |
|                | Glomerulonephritis antiglomerular basement membrane | K03..00   |
|                | Nephritis glomerulonephritis                        | K03z.00   |
|                | Nephritis interstitial diffuse                      | K03y200   |
|                | Glomerulonephritis acute                            | K00..00   |
|                | Glomerulonephritis subacute                         | 583 GB    |
|                | Mesangiocapillary glomerulonephritis                | K032y14   |
|                | Glomerulonephritis membranous                       | K031.00   |
|                | Membranoproliferative glomerulonephritis            | K032.00   |
|                | Proliferative glomerulonephritis                    | K030.00   |
|                | Rapidly progressive glomerulonephritis              | K033.00   |
|                | Necrosis kidney acute tubular                       | K040.00   |

*Continued*

**Table A2. Adverse Event Diagnostic Codes, *continued***

| Category | THIN Read Code Description         | Read Code |
|----------|------------------------------------|-----------|
|          | Renal failure                      | K06..00   |
|          | Renal medullary necrosis           | K042.00   |
|          | Renal papillary necrosis           | K042.11   |
|          | Necrosis renal cortical bilateral  | K041.00   |
|          | Uraemia                            | K06..11   |
| Seizure  | Epilepsy nonconvulsive generalized | F250.00   |
|          | Petit mal                          | F250000   |
|          | Grand mal epilepsy                 | F251000   |
|          | Epilepsy convulsions               | F25z.00   |
|          | Idiopathic epilepsy                | F25..00   |
|          | Convulsion                         | R003.00   |
|          | Seizure                            | R003z11   |
|          | Convulsion nonepileptic            | R003z00   |
|          | Infantile spasm                    | F256.00   |

THIN = The Health Improvement Network (CSD Medical Research UK).

**Table A3. Community-Acquired Pneumonia Diagnostic Codes**

| THIN Read Code Description                            | Read Code |
|-------------------------------------------------------|-----------|
| Mycoplasma pneumonia                                  | A3BXA00   |
| Mycoplasma pneumonia                                  | AyuK900   |
| Klebsiella pneumoniae                                 | A3BXB00   |
| Acute bronchitis due to mycoplasma pneumonia          | H060A00   |
| Pneumonia and influenza                               | H2...00   |
| Viral pneumonia                                       | H20..00   |
| Pneumonia due to adenovirus                           | H200.00   |
| Pneumonia due to respiratory syncytial virus          | H201.00   |
| Pneumonia due to parainfluenza virus                  | H202.00   |
| Viral pneumonia NEC                                   | H20y.00   |
| Viral pneumonia NOS                                   | H20z.00   |
| Lobar (pneumococcal) pneumonia                        | H21..00   |
| Other bacterial pneumonia                             | H22..00   |
| Pneumonia due to haemophilus influenza                | H222.00   |
| Pneumonia due to haemophilus influenza                | H222.11   |
| Pneumonia due to streptococcus                        | H223.00   |
| Pneumonia due to streptococcus, group B               | H223000   |
| Pneumonia due to staphylococcus                       | H224.00   |
| Pneumonia due to other specified bacteria             | H22y.00   |
| Pneumonia due to other aerobic gram-negative bacteria | H22yX00   |
| Pneumonia due to bacteria NOS                         | H22yz00   |
| Bacterial pneumonia NOS                               | H22z.00   |
| Pneumonia due to other specified organisms            | H23..00   |
| Pneumonia due to mycoplasma pneumonia                 | H231.00   |
| Pneumonia due to pleuropneumonia like organisms       | H232.00   |
| Chlamydial pneumonia                                  | H233.00   |
| Pneumonia due to specified organism NOS               | H23z.00   |
| Pneumonia with infectious diseases EC                 | H24..00   |
| Pneumonia with whooping cough                         | H243.00   |
| Pneumonia with pertussis                              | H243.11   |
| Pneumonia with other infectious diseases EC           | H24y.00   |
| Pneumonia with varicella                              | H24y700   |
| Pneumonia with other infectious diseases EC NOS       | H24yz00   |
| Pneumonia with infectious diseases EC NOS             | H24z.00   |
| Bronchopneumonia due to unspecified organism          | H25..00   |
| Pneumonia due to unspecified organism                 | H26..00   |
| Lobar pneumonia due to unspecified organism           | H260.00   |
| Basal pneumonia due to unspecified organism           | H261.00   |

*Continued*



**Table A3. Community-Acquired Pneumonia Diagnostic Codes, continued**

| THIN Read Code Description                            | Read Code |
|-------------------------------------------------------|-----------|
| Postoperative pneumonia                               | H262.00   |
| Influenza with pneumonia                              | H270.00   |
| Influenza with bronchopneumonia                       | H270000   |
| Influenza with pneumonia, influenza virus identified  | H270100   |
| Influenza with pneumonia NOS                          | H270z00   |
| Atypical pneumonia                                    | H28..00   |
| Other specified pneumonia or influenza                | H2y..00   |
| Pneumonia or influenza NOS                            | H2z..00   |
| Aspiration pneumonia due to vomit                     | H470312   |
| Abscess of lung with pneumonia                        | H530300   |
| Bronchiolitis obliterans organising pneumonia         | H564.00   |
| Interstitial pneumonia                                | H56y100   |
| Other viral pneumonia                                 | Hyu0800   |
| Pneumonia due to other aerobic gram-negative bacteria | Hyu0900   |
| Other bacterial pneumonia                             | Hyu0A00   |
| Pneumonia due to other specified infectious organisms | Hyu0B00   |
| Pneumonia in bacterial diseases classified elsewhere  | Hyu0C00   |
| Pneumonia in viral diseases classified elsewhere      | Hyu0D00   |
| Pneumonia in other diseases classified elsewhere      | Hyu0G00   |
| Other pneumonia, organism unspecified                 | Hyu0H00   |
| Other aspiration pneumonia as a complication of care  | SP13100   |

EC = elsewhere classified; NEC = not elsewhere classified; NOS = not otherwise specified;  
 THIN = The Health Improvement Network (CSD Medical Research UK).

**Table A4. Severe Adverse Events Per 100,000 Visits by Propensity Score Quintile**

| Propensity Score Quintile | Risk Difference for Antibiotic Use |                |               |         |
|---------------------------|------------------------------------|----------------|---------------|---------|
|                           | No.                                | Point Estimate | 95% CI        | P Value |
| All                       | 1,316,340                          | -1.60          | -5.29 to 2.09 | .39     |
| 1st                       | 270,655                            | -1.62          | -5.31 to 2.07 | .39     |
| 2nd                       | 267,012                            | 1.73           | -3.20 to 6.66 | .49     |
| 3rd                       | 263,496                            | 1.27           | -3.71 to 6.25 | .62     |
| 4th                       | 260,914                            | 4.50           | -5.31 to 9.53 | .08     |
| 5th                       | 254,263                            | 2.87           | -2.25 to 7.99 | .27     |

| <b>Table A5. Severe Adverse Events Per 100,00 Visits: Specific vs Other Antibiotic Class</b> |                                           |                |                |
|----------------------------------------------------------------------------------------------|-------------------------------------------|----------------|----------------|
| <b>Antibiotic</b>                                                                            | <b>Risk Difference for Antibiotic Use</b> |                |                |
|                                                                                              | <b>Point Estimate</b>                     | <b>95% CI</b>  | <b>P Value</b> |
| Any antibiotic vs none                                                                       | -1.07                                     | -4.52 to 2.38  | .54            |
| Specific antibiotic class vs other antibiotic classes                                        |                                           |                |                |
| β-Lactams                                                                                    | -2.41                                     | -6.52 to 1.70  | .25            |
| Macrolides                                                                                   | 2.40                                      | -3.26 to 8.07  | .40            |
| Fluoroquinolones                                                                             | 9.00                                      | -8.24 to 26.24 | .31            |
